# Supplementary material
Source: PubMed Central journal article supplement (PMC4491445)
Supplement: NIHMS702306-supplement-S1.pdf [file NIHMS702306-supplement-S1.pdf]

**Supplementary Table S1. Primer sequences for real-time qPCR**

| Primer <sup>1</sup> | Sequence                        | % Eff | bp size | Spans an Exon/Exon Boundary |
|---------------------|---------------------------------|-------|---------|-----------------------------|
| MSTN                | F 5'-CGGAGAATGCGAATTTGTGTTTC-3' | 102   | 110     | NO                          |
|                     | R 5'-GGGACATCTTGGTGGGTGTG-3'    |       |         |                             |
| MyoD                | F 5'-CGCAGGAGAAACAGCTACGA-3'    | 103   | 104     | YES                         |
|                     | R 5'-ATGCTTGAGAGGCAGTCGAG-3'    |       |         |                             |
| MyF5                | F 5'-TGAGGGAACAGGTGGAGAACT-3'   | 115   | 185     | YES                         |
|                     | R 5'-ACTCTGCTCCGTCGCGTA-3'      |       |         |                             |
| MYOG                | F 5'-CAGCCTCAACCAGCAGGAG-3'     | 96    | 166     | YES                         |
|                     | R 5'-ACTGCTCAGGAGGTGATCTG-3'    |       |         |                             |
| MRF4                | F 5'-AGGCTGGATCAGCAGGACAAAA-3'  | 102   | 139     | YES                         |
|                     | R 5'-CGCGGGAATGGTCGGAAG-3'      |       |         |                             |
| PAX7                | F 5'-GAAGGCCTTTGAGAGGACCC-3'    | 93    | 158     | YES                         |
|                     | R 5'-GGTTGAATGCTGCGAGTTGG-3'    |       |         |                             |
| $\beta$ -ACT        | F 5'-GTCCACCTCCAGCAGATGT-3'     | 94    | 168     | NO                          |
|                     | R 5'-TAAAGCCATGCCAATCTCG-3'     |       |         |                             |

<sup>1</sup>Primers were designed using Primer-BLAST for myostatin (MSTN), myogenic determination factor 1 (MyoD), myogenic factor 5 (MyF5), myogenin (MYOG), myogenic regulatory factor 4 (MRF4), paired box 7 (PAX7), and  $\beta$ -actin ( $\beta$ -ACT).
